# Supplementary material
Source: publisher figshare collection journal article supplement (https://frontiersin.figshare.com/ndownloader/files/15296858)
Supplement: Supplementary file [file 15296858]

**Figure S1.** The supplement of the weighted correlation network construction.

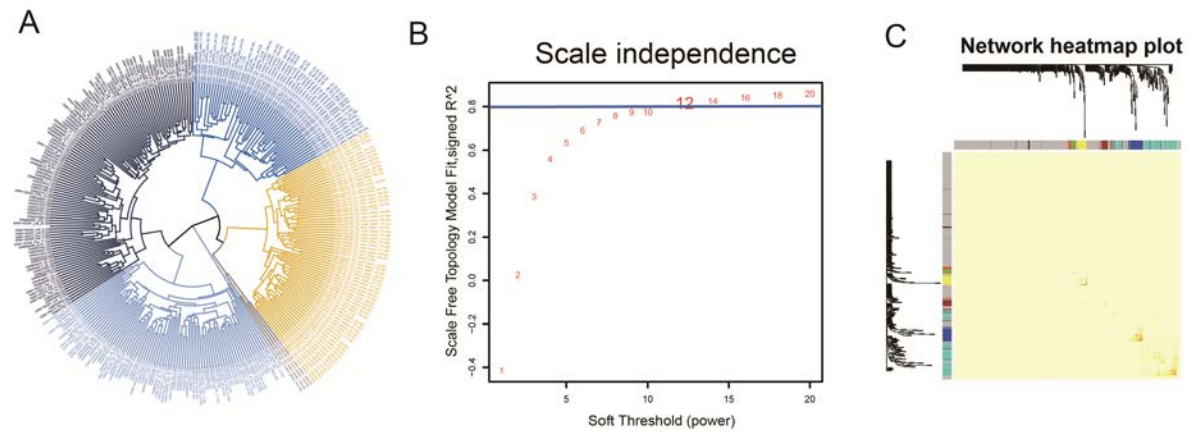

The construction of the weighted correlation network. A) cluster analysis of samples based on the flashClust method. B) The soft thresholding selection. C) Interactions analysis among gene co-expression modules. The brightness of the yellow color in the middle represents the relativity degree of different modules.
